# Supplementary material
Source: PubMed Central journal article supplement (PMC3995475)
Supplement: supp_D047506_jlr.D047506-4.pdf [file supp_D047506_jlr.D047506-4.pdf]

Figure S4

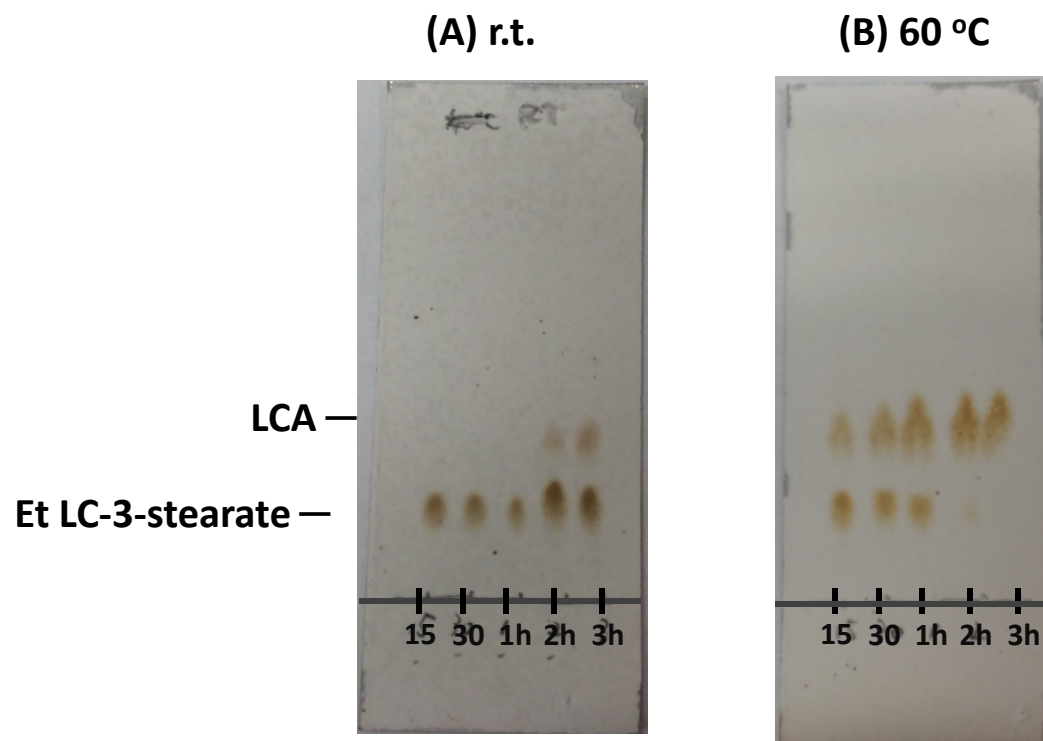

**Figure S4**, Time-course experiment for the hydrolysis of stearyl ethyl lithocholate; Ethyl lithochol-3-stearate (*Ca.* 0.5mg) was suspended in 500 $\mu$ L of 0.1N NaOH (in 50% isoPrOH), and the mixture was stand either or (A) at room temperature or (B) at 60°C . Aliquot (~1 $\mu$ L) of each reaction mixture was loaded on the C18 TLC plate at the time point of 15min, 30min, 1h, 2h, and 3h. TLC plate was developed with 95%methanol containing 0.5%AcOH. The spots were visualized by 50% H<sub>2</sub>SO<sub>4</sub> with heating at 120°C.
