# Supplementary material
Source: PubMed Central journal article supplement (PMC3995475)
Supplement: supp_D047506_jlr.D047506-5.pdf [file supp_D047506_jlr.D047506-5.pdf]

## Table S1

**Table S1:** Comparison of ethanol and aqueous NaOH on the efficiency of fecal bile acid extraction.

|   | Solvent   | CA    | CDCA | DCA   | LCA  | UDCA | isoDCA | isoLCA | 3OxoLCA | Total        |
|---|-----------|-------|------|-------|------|------|--------|--------|---------|--------------|
| A | Ethanol   | 0.00  | 0.13 | 15.96 | 2.57 | 0.00 | 1.59   | 0.47   | 0.00    | <b>20.73</b> |
|   | 0.1N NaOH | 0.00  | 0.16 | 21.59 | 2.68 | 0.00 | 1.60   | 0.50   | 0.00    | <b>26.52</b> |
| B | Ethanol   | 0.00  | 0.25 | 2.84  | 1.57 | 0.00 | 0.27   | 0.19   | 0.56    | <b>5.68</b>  |
|   | 0.1N NaOH | 0.00  | 0.38 | 2.70  | 1.25 | 0.00 | 0.37   | 0.14   | 0.58    | <b>5.43</b>  |
| C | Ethanol   | 11.44 | 7.22 | 9.53  | 0.61 | 0.49 | 0.61   | 0.00   | 0.00    | <b>29.90</b> |
|   | 0.1N NaOH | 9.42  | 6.16 | 7.80  | 0.47 | 0.40 | 0.80   | 0.00   | 0.00    | <b>25.04</b> |

The dried stool was extracted with either 75% ethanol or 0.1N NaOH aq, respectively. After entire clean up - derivatization, bile acids were quantified by the HPLC method.
